# Supplementary material
Source: PubMed Central journal article supplement (PMC4178665)
Supplement: AEM.01785-14_zam999105675so1.pdf [file AEM.01785-14_zam999105675so1.pdf]

**Title**

FLP-FRT-based method for unmarked deletions of *CHU\_3237 (porU)* and large genomic fragments of *Cytophaga hutchinsonii*

**Running title**

Deletions by FLP-FRT in *Cytophaga hutchinsonii*

**Authors**

Ying Wang, Zhiquan Wang, Jing Cao, Zhiwei Guan and Xuemei Lu\*

**Authors' affiliation**

State Key Laboratory of Microbial Technology, School of Life Science, Shandong University, Jinan 250100, China

\*Corresponding author. Address: State Key Laboratory of Microbial Technology, School of Life Science, Shandong University, Jinan 250100, China.

Tel: +86-531-88369495.

Fax: +86-531-88565610.

E-mail: [luxuemei@sdu.edu.cn](mailto:luxuemei@sdu.edu.cn)

## SUPPLEMENTAL MATERIAL

### SUPPLEMENTAL METHODS

**Construction of pSKSO8TG.** A derivative of pSKSO8 (1), pSKSO83, whose the *oriC* region was replaced with PCR-amplified fragment with primers *soriF* and *soriR6* at the restriction sites of *PstI* and *XbaI*, was used as the vector backbone. A Rho-independent transcription terminator predicted by TransTermHP (2) between *gldJ* and *purF* was amplified by PCR with primers *TermF* and *TermR*, digested with *XbaI* and *BglII*, and inserted into the backbone of pSKSO8 digested with *XbaI* and *BamHI* to generate pSKSO8T. The green fluorescent protein gene (*gfp*) was amplified from pSK1284gfp (1) with primers *gfpF* and *gfpR* (introducing a *SalI* site next to *BamHI*). The fragment was digested with *XbaI* and *BamHI* and inserted into the corresponding site of pSKSO8T to generate pSKSO8TG. pSKSO8TG was designed as an expressing vector into which promoters and CTDs from *C. hutchinsonii* could be ligated upstream and downstream of *gfp*, respectively. Besides using pSKSO8TG as a fusion expression vector to secrete GFP into the medium (data not shown), it was used to construct the FLP recombinase expressing vector pCHF.

**Measurement of growth rates in PY6 culture.** Growth rates of cells in PY6 medium were measured using a Bioscreen C analyzer (Oy Growth Curves Ab Ltd, Helsinki, Finland) in a honeycomb plate. *C. hutchinsonii* cells were grown in PY6 medium to mid-exponential phase and harvested by centrifugation. Cells were resuspended in PY6 medium to an optical density at 600 nm of 0.7~0.8. Then they were inoculated into fresh

medium without or with antibiotics. The inoculum concentration was 3% (v/v) of 200  $\mu$ l medium in each well. The measurement was carried out in triplicate. The cultures were grown at 30°C with continuously shaking (Amplitude: medium; Speed: normal) and OD<sub>600</sub> measurements were taken every 90 min.

**In-gel digestion and LC-ESI-MS/MS Analysis by Q Exactive.** The gel slices were cut into small cubes of 1 mm<sup>3</sup> and then washed three times with ddH<sub>2</sub>O. The gel pieces were destained with 50% ethanol at 37°C overnight and dehydrated with acetonitrile and dried in a speed-vacuum concentrator (Thermo Scientific, San Jose, CA). Disulfide bonds were cleaved by incubating with 200  $\mu$ l of 10 mM DTT/100 mM ammonium bicarbonate for 1 h at 56°C. Alkylation of cysteines was performed by incubating with 200  $\mu$ l of 55 mM iodoacetamide/100 mM ammonium bicarbonate for 45 min at room temperature in darkness. The gel pieces were dehydrated again and vacuum-dried. Gel pieces were rehydrated with trypsin solution (10 ng/ $\mu$ l in 100 mM ammonium bicarbonate). After a 15-min incubation at 4°C, the gel pieces were covered with 100 mM ammonium bicarbonate. Proteolysis was performed overnight at 37°C. The peptides in gel was extracted once with 100  $\mu$ l 5% formic acid/50% acetonitrile, once with 75% acetonitrile, twice by 100% acetonitrile. All the supernatant was combined and vacuum-dried.

The peptide was resuspended in buffer A (2% ACN, 0.1% FA) and centrifuged at 20 000 g for 2min. The supernatant was transferred into sample tube and loaded onto an Acclaim PepMap 100 C18 trap column (Dionex, Sunnyvale, CA, 75  $\mu$ m $\times$ 2 cm) by EASY nLC1000 nanoUPLC (Thermo Scientific, San Jose, CA) and the peptide was eluted onto

an Acclaim PepMap RSLC C18 analytical column (Dionex, Sunnyvale, CA, 50  $\mu\text{m}$ ×15 cm). A 34 min-gradient program was run at 300 nl/min, starting from 5 to 30% B (80% ACN, 0.1% FA), followed by 2 min linear gradient to 40% B, then 2 min to 80% B, and maintenance at 80% B for 4 min.

The peptides were subjected to NSI source followed by tandem mass spectrometry (MS/MS) in Q Exactive (Thermo Scientific, San Jose, CA) coupled online to the UPLC. Intact peptides were detected in the Orbitrap at a resolution of 70 000. Peptides were selected for MS/MS using 25% NCE with 4% stepped NCE; ion fragments were detected in the Orbitrap at a resolution of 17 500. A data-dependent procedure that alternated between one MS scan followed by 15 MS/MS scans was applied for the top15 precursor ions above a threshold ion count of 3E4 in the MS survey scan with 5.0 s dynamic exclusion. The electrospray voltage applied was 1.8 kV. Automatic gain control (AGC) was used to prevent overfilling of the ion trap; 2E5 ions were accumulated for generation of MS/MS spectra. For MS scans, the m/z scan range was 350 to 1 800 Da.

**Scanning electron microscopy.** Samples for scanning electron microscopy were prepared as described by Ji (3). Cells were grown on Whatman No. 1 filter paper on Stanier agar and fixed with 2.5% (v/v) glutaraldehyde in 100 mM PBS buffer ( $\text{NaH}_2\text{PO}_4\text{-Na}_2\text{HPO}_4$ , pH 7.3) for 8 hours at 4°C. Fixed samples were washed twice in 100 mM PBS buffer, and dehydrated with 30%, 50%, 70%, 90% ethanol once and 100% ethanol for twice, then dried in a glass desiccator. Samples were processed according to

standard procedure, and viewed with a JEOL JSM-6700F field emission scanning electron microscope.

**TABLE S1.** Primers used in this study

| Primers     | Sequence <sup>a</sup>                                                        |
|-------------|------------------------------------------------------------------------------|
| blaF        | CTGGT <u>GAGTACT</u> CAACCAAGTCA                                             |
| blaR        | TCCAC <u>GAA</u> TTCTTACCAGGTTCAA                                            |
| isermF      | TTAAA <u>AGGATCCT</u> TACACTGCAGCAA <u>AGGTACCT</u> CTTGACAACCACCC<br>G      |
| isermR      | GAGCGAG <u>CATGCGG</u> GAGCTGTCTAGATACAT <u>GAGCTCCG</u> GAGCAAGGCAA<br>GACC |
| sermF       | TATGGAGCTCTGACGCTCATCGGTATTTG                                                |
| sermR       | ACTAGGTACCTCTTGACAACCACCCGAC                                                 |
| frtSKF      | CTTAGAGCTCATCAAGTCGACGTGTAGGCTGGAGCTGCTTCG                                   |
| frtSKR      | CGGAGGTACCGAATTAGCCATGGTCCATATG                                              |
| KSfrtF      | TTTAGGTACCGTGTAGGCTGGAGCTGCTTCG                                              |
| KSfrtR      | TACCGAGCTCTACGTGTCGACGAATTAGCCATGGTCCATATG                                   |
| BssHII-ermF | ACATGCGCGCTGACGCTCATCGGTATTTGC                                               |
| BssHII-ermR | TATTGCGCGCTCTTGACAACCACCCGAC                                                 |
| cfxA-F      | ATTGGCGCGCAATCAGTTCTTTAGCGATTAC                                              |
| cfxA-R      | CACTGCGCGCTTTAAGATTTTACTGAAGTTTGC                                            |
| soriR6      | GATATACTGCAGATATTTTAAACAGC                                                   |
| soriF       | CTATA <u>TCTAGA</u> ACTAGTGGATCCTATATATCATTTCTTC                             |
| TermF       | CCAT <u>TCTAGAC</u> AGAGGATCCTCAGATAGACTTTCATTTTC                            |
| TermR       | TCTGAGATCTGAGCTGCAAAAGTGAG                                                   |
| gfpF        | CCGTT <u>TCTAGAT</u> TATGGTAAGCAAAGGAGAAGAAC                                 |
| gfpR        | ATCGGATCCCAGAGTCGACTTTTGTATAGTTTCATC                                         |
| ompAF       | AGCCGAGCTCTTGCCACATTTGGTGTTTTTTTTG                                           |
| ompAR       | CCAGTGATTTTTTTCTCCATACTTAATTTTTTTAATTAC                                      |
| catF        | GTAATTAATAAAATTAAGTATGGAGAAAAAATCACTGG                                       |
| catR        | AATGGTACCGTTTAAGGGCACCAATAAC                                                 |
| cat-PstIF   | AGCCCTGCAGTTGCCACATTTGGTGTTTTTTTTG                                           |
| cat-SDR     | AACGGTACCCACTTGCATGCGATAAACTTTTAATTACGCCCCGCCCTGC<br>CACTCATC                |
| P1284galK-F | CTTGGAGCTCGCCACTGTTTGATGTAGTTAG                                              |
| P1284galK-R | AAGCTCTAGATTAGCACTGTCCTGCTCCTTGTG                                            |
| flpF        | GGCCGCATGCCACAATTTGATATATTAT                                                 |
| flpR        | ACGTGGTACCTGCGTACTTATATGCGTCTAT                                              |
| cat-KpnIR   | AATCGGTACCCAACCTGCATGCGTTTAAGGGCACCAATAAC                                    |
| C3237F      | GTCTGAGCTCTTTCTGTTTCCGTTGGTTAC                                               |
| C3237R      | AAGTGTCGACTGCAGATTGACCAAACGTGTG                                              |
| 3237H1F     | GTAAGGATCCAATATTCTGCTCGGGTTCTGC                                              |

---

|          |                                     |
|----------|-------------------------------------|
| 3237H1R  | GCACGGTACCAAATACCTAATAGGAAGATGC     |
| 3237H2F  | ACCTGTCGACGTTTTTGAGAAACTGGTGCTC     |
| 3237H2R  | ACTTGAGCTCTTGTTGGTTTTAACAGGCTCGG    |
| 3237UF   | CCATACGGAAACCAGATATAC               |
| 3237UR   | TGAACGCTTACGGAAGAAAG                |
| 3237DR   | TACAGAAGACTGTACGCTTCC               |
| 3237Test | TGTTTTGCTGGTCATTC                   |
| 0344H1F  | GCCGTCTAGATCCGAAAAGCAGAAACATAGAG    |
| 0344H1R  | CACCGAGCTCAACATAAAACCACCATAAGCAGCTC |
| 0344H2F  | CCGAGGTACCATTAATACTAATAAGGCAG       |
| 0344H2R  | ATGTGGATCCTTACCTGTACCGCAACTGTTC     |
| 0344UF   | GGCAAAGGTTTAAACACATTCAGAG           |
| 0344UR   | TCATTTGCTGATTGGTATAGGG              |
| 0344DR   | GTGGCAATCATACAATCATTGAGG            |
| 3202H1F  | TGGTGGATCCTTTAGGTGTGAAGAACTTTGC     |
| 3202H1R  | CGTCGGTACCTTTCATGTTGTTTCATCGTC      |
| 3202H2F  | GCCAGTCGACAACATTTTGTAGTACCCGATC     |
| 3202H2R  | TTAAGAGCTCAACTCCTACCACCAGACCCAG     |
| 3202UF   | TCCGAAATGGATGCTAAGAC                |
| 3202UR   | GGATAATAAAGCATGACTGGC               |
| 3202DR   | AAATGAATTGCCTAGCTGG                 |
| 3202Test | AGGAGTATTATTGGTCGTC                 |
| 3190H1F  | CGGCGAGCTCATTTAATTGTTGTAGTTACAC     |
| 3190H1R  | CTGCGTCGACTAAAGTACTATAGAGTATG       |
| 3190H2F  | AATTGGTACCGGAGGAATCGGAGCCTGAC       |
| 3190H2R  | CTTAGGATCCAGCAGCGCTTACCAAATCTG      |
| 3190UF   | TCATTTTGATACACAGACGC                |
| 3190UR   | CGTCTTCGCCGTAATATAC                 |
| 3190DR   | CTATACCCATGATTGTCATC                |
| 0804H1F  | TGGAGGATCCATGCCTTTTATCTGGATATTG     |
| 0804H1R  | GAGTGGTACCTAGTGTTGATCTGGTAACTTC     |
| 0804H2F  | GTCAGTCGACAATGGTACATTGGGCGTTAG      |
| 0804H2R  | TTATGCATGCCAACTGATACAGCAACCGTAC     |
| 0804UF   | GATTTTGGATTTCGAACGCAAG              |
| 0804UR   | CTCCAACAGACAACCTCAATC               |
| 0804DR   | GTATTTCTTTCGTCTCCTGG                |
| 0804Test | CATGGATTGAGCTTTACACC                |
| 0819H1F  | TGCTGGATCCTTTGACATTAACGGGATTCAC     |
| 0819H1R  | CGCAGGTACCATGTATTTTGTATGCAGTATC     |
| 0819H2F  | GTTCGTCGACACCATGTATAACAGGTTTCAGC    |
| 0819H2R  | TACAGCATGCACAGGCAATGATCTCCTTCAG     |

---

---

|          |                                   |
|----------|-----------------------------------|
| 0819UF   | TCGATCTCTTATCTGGTGAC              |
| 0819UR   | CGTATACCAGCACAAAGTATGC            |
| 0819DR   | TTCCCGATTCTTTGATTGCTC             |
| 0834H1F  | TCTGGAGCTCTTTCAGCCTTTAGTATTAGGC   |
| 0834H1R  | GTGCGTCGACTTTATAGAATTGCATAGTCTG   |
| 0834H2F  | CGACGGTACCTTAAGTACGCAGAATCCTTC    |
| 0834H2R  | TGTCGGATCCATATAGCAGATAACGCATCTC   |
| 0834UF   | CTGTCATTTCTTCTACAAACATCCG         |
| 0834UR   | TCACATTCGTAAAGTCCATCAC            |
| 0834DR   | ACTTCCACAGGATGTATAGGTGC           |
| 0834Test | CGCAAAAGCACATTGG                  |
| 0841H1F  | ACTAGAGCTCACCTTTCAATGGCGTAACTTC   |
| 0841H1R  | CGTTGTTCGACGCCTGTATAGGTATAAGTAG   |
| 0841H2F  | ATTGCCATGGTAGAAGGGTTAGCATCAGGAG   |
| 0841H2R  | GTTCCGGATCCTTCCATCTTCTAACGTTTCG   |
| 0841UF   | CAAATTCAAACCTTACGGTC              |
| 0841UR   | GTTGTCATTCGGTACACTAC              |
| 0841DR   | AGGAAGAATAATCTGTCAGG              |
| 0428H1F  | TGCTGAGCTCTACTTGTAACTTCCCCTTTG    |
| 0428H1R  | CTCAGTCGACATCCCCTGTAAATCGTAATG    |
| 0428H2F  | ATGACCATGGAACACAGATTGCACCCAAG     |
| 0428H2R  | TCAAGGATCCAACAGCGATGGTATGGTCAG    |
| 0428UF   | GTAGATTGAGTAGCAGTCTG              |
| 0428UR   | TCAAAAAGCGTGTTGTA                 |
| 0428DR   | TCCAGAACCATCTCCTAACTG             |
| 0428Test | GCAGGAAAACCTTAAACAGTG             |
| 0449H1F  | CAGCGCATGCAGAACATAAAAGATCTGTAC    |
| 0449H1R  | TAACGTCGACTGACAAGAATACAACGACCTG   |
| 0449H2F  | GTTAGGTACCATCATAGAGCTCAGGCGTTAG   |
| 0449H2R  | ATCTGGATCCTGCACCTATTCAGAATGGAG    |
| 0449UF   | ACAGACTGATCGAAATGAAC              |
| 0449UR   | TGTTTCAGGAGCAAGTATTAG             |
| 0449DR   | CTGTTTGTAAATGCACCTACC             |
| 1075H1F  | TAACGCATGCTGCTGCAGGGAATTCACCGTAC  |
| 1075H1R  | ATTCGTCGACAGCTCCGGATGGTGTATTGATC  |
| 1075H2F  | GCACGGTACCATATCGTAGAGGTATCTACAGC  |
| 1075H2R  | TCTCGGATCCTTGTCGTTTCGCGTTTGTGCATC |
| 1075UF   | GTTTGCCTTAGGTGATTTAG              |
| 1075UR   | GGCATTGTTGTTCCAGATTAC             |
| 1075DR   | AAGGTTTCCTGTGTTTCAAG              |
| 1075Test | TTGATTGCCTGTCTGTAC                |

---



---

|         |                                   |
|---------|-----------------------------------|
| 1107H1F | CTTAGCATGCATTAAGCGAAAATGGTGCTGCTG |
| 1107H1R | GCCGGTCGACGAACGTATATTCATATGTATAG  |
| 1107H2F | CCACGGTACCAGCATTCCGGGTTTATTATAAC  |
| 1107H2R | CGCAGGATCCATGTGTCAATAGAATACCGATC  |
| 1107UF  | CGTAGTTATAACTGCTGACG              |
| 1107UR  | TGGTCTGTATCAACTCATTG              |
| 1107DR  | ATCATCCAGAGATTGACTGC              |

---

<sup>a</sup> Restriction sites on the primers are underlined

**TABLE S2.** Putative protein substrates of the T9SS absent from the culture fluid of the $\Delta$ 3237 mutant identified by LC-MS/MS

| Locus tag | Protein description                      |
|-----------|------------------------------------------|
| CHU_0220  |                                          |
| CHU_0268  |                                          |
| CHU_0344  |                                          |
| CHU_0353  | $\beta$ -mannanase                       |
| CHU_0361  |                                          |
| CHU_0420  |                                          |
| CHU_0521  |                                          |
| CHU_0530  |                                          |
| CHU_0531  |                                          |
| CHU_0804  |                                          |
| CHU_0834  |                                          |
| CHU_0835  |                                          |
| CHU_0938  |                                          |
| CHU_0939  |                                          |
| CHU_0961  | Candidate $\beta$ -glycosidase           |
| CHU_1075  | Candidate $\beta$ -glycosidase           |
| CHU_1105  |                                          |
| CHU_1107  | Endoglucanase                            |
| CHU_1155  | Candidate xyloglucanase                  |
| CHU_1221  |                                          |
| CHU_1251  |                                          |
| CHU_1335  | Endoglucanase-related protein            |
| CHU_1336  | Endoglucanase-related protein            |
| CHU_1557  |                                          |
| CHU_1634  |                                          |
| CHU_1655  | Non-processive endocellulase             |
| CHU_1858  |                                          |
| CHU_1906  |                                          |
| CHU_2149  | Candidate retaining $\beta$ -glycosidase |
| CHU_2225  | Gliding motility-related protein         |
| CHU_2243  |                                          |
| CHU_2304  |                                          |
| CHU_2437  |                                          |
| CHU_2463  |                                          |
| CHU_2524  | Subtilisin-like serine protease          |

---

|          |                                                   |
|----------|---------------------------------------------------|
| CHU_2603 |                                                   |
| CHU_2674 |                                                   |
| CHU_2755 | Concanavalin A-like lectin/glucanases superfamily |
| CHU_2780 |                                                   |
| CHU_2818 |                                                   |
| CHU_2850 |                                                   |
| CHU_2852 | Candidate $\beta$ -glycosidase                    |
| CHU_2922 |                                                   |
| CHU_3021 |                                                   |
| CHU_3251 |                                                   |
| CHU_3267 |                                                   |
| CHU_3435 |                                                   |
| CHU_3439 |                                                   |
| CHU_3440 | $\beta$ -glycosidase related protein              |
| CHU_3441 | $\beta$ -glycosidase related protein              |
| CHU_3488 |                                                   |
| CHU_3587 |                                                   |
| CHU_3618 |                                                   |
| CHU_3654 |                                                   |
| CHU_3715 |                                                   |
| CHU_3802 | Possible protease                                 |

---

**Fig. S1**

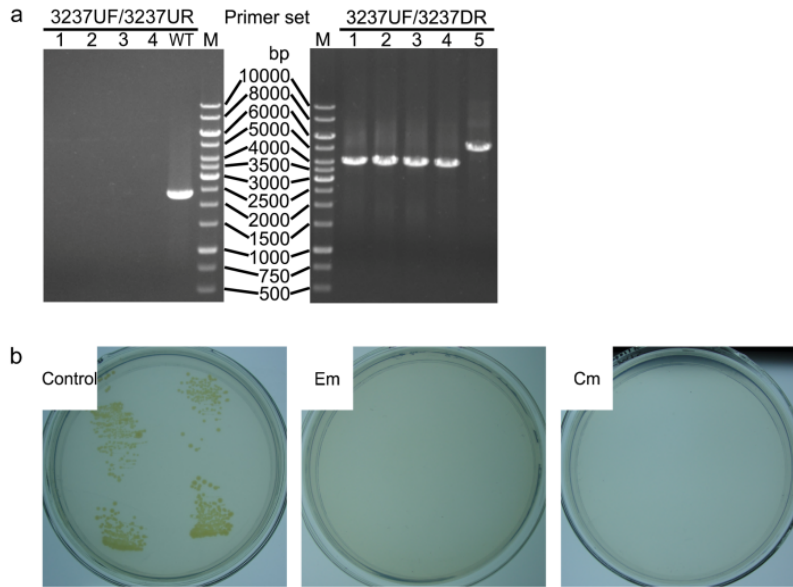

**Fig. S1.** PCR verification and plate tests of the unmarked deletion of *CHU\_3237*. (a) PCR verification of the unmarked deletion of *CHU\_3237*. 1-4, four transformants of the  $\Delta 3237$  mutant; 5, disruption mutant *3237::erm*; WT, wild-type strain; M, DNA marker. (b) plate tests to confirm the loss or existence of the resistance gene and pCHF in the  $\Delta 3237$  mutant. *Control*, PY6 agar without any antibiotics; *Em*, PY6 agar containing erythromycin; *Cm*, PY6 agar containing chloramphenicol.

**Fig. S2**

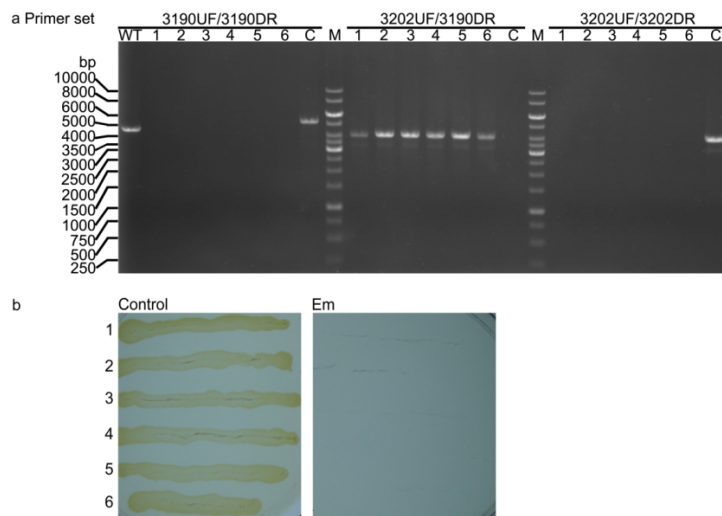

**Fig. S2.** PCR verification and plate tests of mutant  $\Delta 3202-3190$ . (a) PCR verification of mutant  $\Delta 3202-3190$ . 1-6, six transformants of the  $\Delta 3202-3190$  mutant; C, mutant  $\Delta 3202-3190::erm$ ; WT, wild-type strain; M, DNA marker. (b) plate tests to confirm the loss of the selectable marker in the  $\Delta 3202-3190$  mutant. Control, PY6 agar without any antibiotics; Em, PY6 agar containing erythromycin.

**Fig. S3**

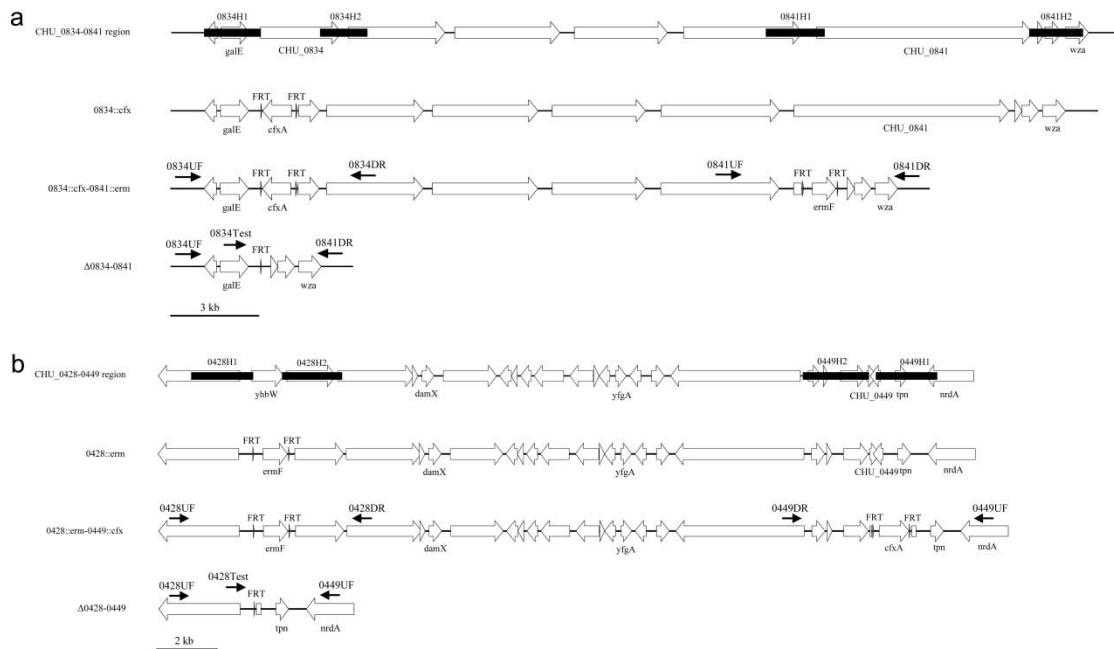

**Fig. S3.** Deletions of the fragments between *CHU\_0834* and *CHU\_0841* (a), *CHU\_0428* and *CHU\_0449* (b). Black arrows show approximate locations and orientations of primers; black filled boxes indicate homologous arms; open arrowheads show arrangements and orientations of genes; open boxes indicate residual genes; grey arrowheads indicate FRT sites and their relative orientations.

**Fig. S4**

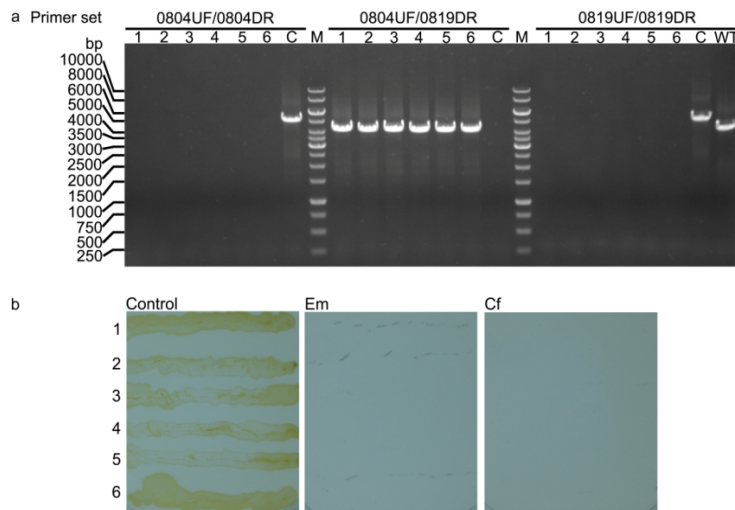

**Fig. S4.** PCR verification and plate tests of mutant  $\Delta 0804-0819$ . (a) PCR verification of mutant  $\Delta 0804-0819$ . 1-6, six transformants of the  $\Delta 0804-0819$  mutant; C, mutant  $0804::erm-0819::cfx$ ; WT, wild-type strain; M, DNA marker. (b) plate tests to confirm the loss of the selectable markers in the  $\Delta 0804-0819$  mutant. Control, PY6 agar without any antibiotics; Em, PY6 agar containing erythromycin; Cf, PY6 agar containing cefoxitin.

**Fig. S5**

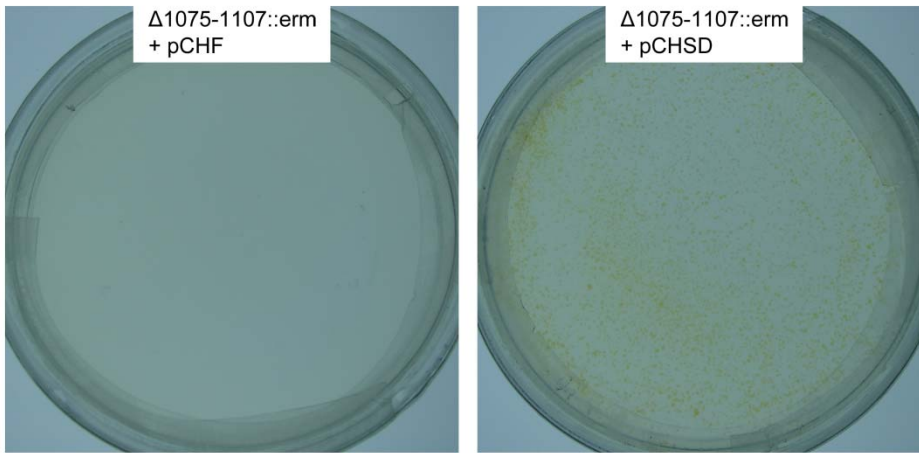

**Fig. S5.** Transformation efficiency of mutant  $\Delta 1075-1107::erm$ . *Left*,  $\Delta 1075-1107::erm$  with pCHF; *right*,  $\Delta 1075-1107::erm$  with control plasmid pCHSD.



**Fig. S6**

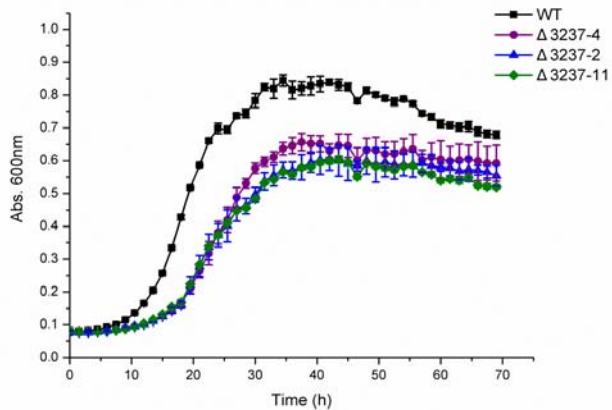

**Fig. S6.** Growth curves of the wild-type strain and the  $\Delta 3237$  mutant in PY6 medium measured by a Bioscreen C analyzer. The cells were grown at 30°C with continuously shaking (Amplitude: medium; Speed: normal) and OD<sub>600</sub> measurements were taken every 90 min. *Black square*, wild-type strain; *Purple circle*, *blue triangle*, *green diamond*, three strains of the  $\Delta 3237$  mutant. All measurements were carried out in triplicate.

**Fig. S7**

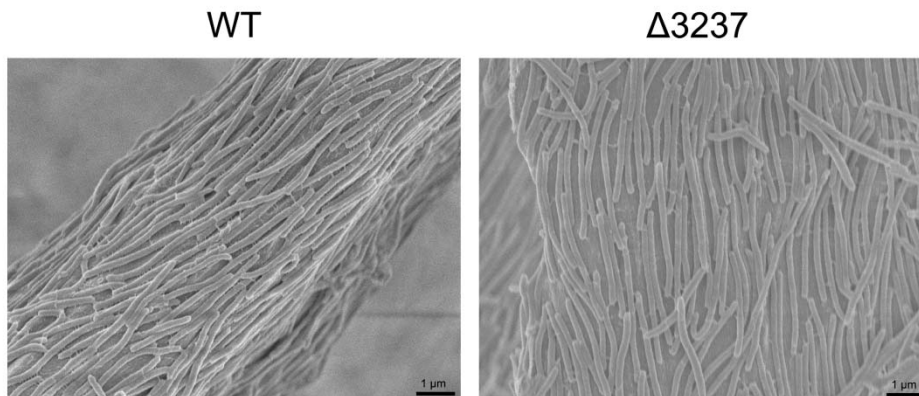

**Fig. S7.** Scanning electron microscopy of the arrangement of cells on filter paper fiber. *Left*, wild-type strain; *right*, mutant  $\Delta 3237$ . Bars indicate 1  $\mu\text{m}$ .

## REFERENCE

1. **Xu Y, Ji X, Chen N, Li P, Liu W, Lu X.** 2012. Development of replicative *oriC* plasmids and their versatile use in genetic manipulation of *Cytophaga hutchinsonii*. *Appl. Microbiol. Biotechnol.* **93**:697–705.
2. **Kingsford CL, Ayanbule K, Salzberg SL.** 2007. Rapid, accurate, computational discovery of Rho-independent transcription terminators illuminates their relationship to DNA uptake. *Genome Biol.* **8**:R22.
3. **Ji X, Bai X, Li Z, Wang S, Guan Z, Lu X.** 2013. A novel locus essential for spreading of *Cytophaga hutchinsonii* colonies on agar. *Appl. Microbiol. Biotechnol.* **97**:7317–7324.
